# Supplementary material for: Impact of CMV PCR Blips in Recipients of Solid Organ and Hematopoietic Stem Cell Transplantation
Source: PubMed Central journal article supplement — Transplant Direct. 2018 May 16;4(6):e355. doi: 10.1097/TXD.0000000000000787 (PMC6089517; doi:10.1097/txd.0000000000000787), 2018-05-16
Supplement: txd-4-e355-s001.pdf [file txd-4-e355-s001.pdf]

## **Description of Supplemental Content**

### **Content:**

This supplementary information contain the results of a logistic regression model constructed using all positive CMV PCR triplicates (for closer detail, see figure legend below).

### **Figure Legend:**

#### **Table S1: The odds ratio (OR) of the positive indicator CMV PCR being a CMV blip.**

\*For each patient with  $\geq 1$  positive CMV PCR triplicate (273 patients), all the positive triplicates were included in the model (n=411). The odds of the positive indicator CMV PCR being a CMV blip, and not an infection, were modelled using logistic regression and adjusting for repeated measurements.

\*\* Factors included in the table are selected using multivariate logistic regression. Other factors included in the models were: age, gender, type of transplantation (solid organ transplantation vs haematopoietic stem cell transplantation).

\*\*\*273 IU/mL is the lower limit of quantification for the used CMV PCR kit.

| <b>Table S1. The odds ratio (OR) of the positive indicator CMV PCR* being a CMV blip in all positive CMV PCR triplicates</b>                                                                                                                                                                                                                                                                                                                                                                                                                                                                                                                                                                                                                                 |                   |                 |                |                       |                 |                |
|--------------------------------------------------------------------------------------------------------------------------------------------------------------------------------------------------------------------------------------------------------------------------------------------------------------------------------------------------------------------------------------------------------------------------------------------------------------------------------------------------------------------------------------------------------------------------------------------------------------------------------------------------------------------------------------------------------------------------------------------------------------|-------------------|-----------------|----------------|-----------------------|-----------------|----------------|
| <b>Factors</b>                                                                                                                                                                                                                                                                                                                                                                                                                                                                                                                                                                                                                                                                                                                                               | <b>Univariate</b> |                 |                | <b>Multivariate**</b> |                 |                |
|                                                                                                                                                                                                                                                                                                                                                                                                                                                                                                                                                                                                                                                                                                                                                              | <b>OR</b>         | <b>(95% CI)</b> | <b>P value</b> | <b>OR</b>             | <b>(95% CI)</b> | <b>P value</b> |
| <b>Use of anti-CMV treatment in relation to the CMV PCR triplicate</b>                                                                                                                                                                                                                                                                                                                                                                                                                                                                                                                                                                                                                                                                                       |                   |                 |                |                       |                 |                |
| <b>No treatment</b>                                                                                                                                                                                                                                                                                                                                                                                                                                                                                                                                                                                                                                                                                                                                          | Ref.              |                 |                | Ref.                  |                 |                |
| <b>Treatment initiated before the indicator sample</b>                                                                                                                                                                                                                                                                                                                                                                                                                                                                                                                                                                                                                                                                                                       | 1.4               | 0.7-2.6         | 0.3            | 1.7                   | 0.9-3.3         | 0.1            |
| <b>Treatment initiated between indicator and response samples</b>                                                                                                                                                                                                                                                                                                                                                                                                                                                                                                                                                                                                                                                                                            | 1.0               | 0.6-1.6         | 0.9            | 1.2                   | 0.7-2.2         | 0.5            |
| <b>Risk associated with CMV IgG serostatus of donor and recipient</b>                                                                                                                                                                                                                                                                                                                                                                                                                                                                                                                                                                                                                                                                                        |                   |                 |                |                       |                 |                |
| <b>High risk</b>                                                                                                                                                                                                                                                                                                                                                                                                                                                                                                                                                                                                                                                                                                                                             | Ref.              |                 |                | Ref.                  |                 |                |
| <b>Intermediary/low risk</b>                                                                                                                                                                                                                                                                                                                                                                                                                                                                                                                                                                                                                                                                                                                                 | 2.0               | 1.2-3.2         | 0.005          | 2.1                   | 1.3-3.6         | 0.003          |
| <b>Viral load of the indicator CMV PCR in the CMV PCR triplicate (IU/mL)</b>                                                                                                                                                                                                                                                                                                                                                                                                                                                                                                                                                                                                                                                                                 |                   |                 |                |                       |                 |                |
| <b>=273***</b>                                                                                                                                                                                                                                                                                                                                                                                                                                                                                                                                                                                                                                                                                                                                               | Ref.              |                 |                | Ref.                  |                 |                |
| <b>&gt;273-910</b>                                                                                                                                                                                                                                                                                                                                                                                                                                                                                                                                                                                                                                                                                                                                           | 0.2               | 0.1-0.5         | <0.0001        | 0.2                   | 0.1-0.4         | <0.0001        |
| <b>&gt;910</b>                                                                                                                                                                                                                                                                                                                                                                                                                                                                                                                                                                                                                                                                                                                                               | 0.08              | 0.03-0.2        | <0.0001        | 0.07                  | 0.03-0.2        | <0.0001        |
| <p>The odds ratio (OR) of the positive indicator CMV PCR being a CMV blip.</p> <p>*For each patient with <math>\geq 1</math> positive CMV PCR triplicate (273 patients), all the positive triplicates were included in the model (n=411). The odds of the positive indicator CMV PCR being a CMV blip, and not an infection, were modelled using logistic regression and adjusting for repeated measurements.</p> <p>** Factors included in the table are selected using multivariate logistic regression. Other factors included in the models were: age, gender, type of transplantation (solid organ transplantation vs haematopoietic stem cell transplantation).</p> <p>***273 IU/mL is the lower limit of quantification for the used CMV PCR kit.</p> |                   |                 |                |                       |                 |                |
